# Supplementary material
Source: PubMed Central journal article supplement (PMC6143006)
Supplement: jamaoncol-4-e180219-s001.pdf [file jamaoncol-4-e180219-s001.pdf]

## Supplementary Online Content

Frezza MA, Jones R, Vullo SL, Asano N, et al. Anthracycline, gemcitabine, and pazopanib in epithelioid sarcoma: a multi-institutional case series [published online April 12, 2018]. *JAMA Oncol*. doi:10.1001/jamaoncol.2018.0219

**eTable 1.** Treatment details

**eTable 2.** Regimens used and corresponding response rate

**eTable 3.** Response rate, median progression-free survival, and median overall survival by morphological subtype, primary site, and response to treatment

**eTable 4.** Population outcome

This supplementary material has been provided by the authors to give readers additional information about their work.

**e-Table 1. Treatment details.**

|                                                     | <b>Anthracycline-based<br/>(N=85)</b> | <b>Gemcitabine-based<br/>(N=41)</b> | <b>Pazopanib<br/>(N=18)</b> |
|-----------------------------------------------------|---------------------------------------|-------------------------------------|-----------------------------|
| <b>Number of selected regimens</b>                  |                                       |                                     |                             |
| • 1                                                 | 63 (74%)                              | 22 (54%)                            | 6 (33%)                     |
| • 2                                                 | 17 (20%)                              | 14 (34%)                            | 7 (39%)                     |
| • 3                                                 | 5 (6%)                                | 5 (12%)                             | 5 (28%)                     |
| <b>Treatment completed (%)</b>                      | 85 (100%)                             | 41 (100%)                           | 18 (100%)                   |
| • PD                                                | 45 (53%)                              | 28 (68%)                            | 17 (94%)                    |
| • Toxicity                                          | 5 (6%)                                | 5 (12%)                             | 1 (6%)                      |
| • Other reasons                                     | 35 (41%)                              | 8 (20%)                             | 0                           |
| <b>Evaluable for response (%)</b>                   | 85 (100%)                             | 41 (100%)                           | 18 (100%)                   |
| <b>Median number of previous lines<br/>(range)</b>  | 0 (0-2)                               | 1 (0-5)                             | 2 (1-4)                     |
| <b>Median number of cycles (range)</b>              | 5 (1-14)                              | 4 (1-15)                            | 2 (1-26)                    |
| <b>Median number of following lines<br/>(range)</b> | 1 (0-6)                               | 1 (0-3)                             | 0 (0-3)                     |

PD: progressive disease; A: anthracycline single agent; AI: anthracycline and ifosfamide; G: gemcitabine single agent; GD: gemcitabine and docetaxel.

**e-Table 2. Regimens used and corresponding response rate.**

|                                       | <b>Regimen used</b>                                  | <b>Response rate</b>                                        |
|---------------------------------------|------------------------------------------------------|-------------------------------------------------------------|
| <b>Anthracycline-based<br/>(N=85)</b> | An: 20 (24%)<br>An/I: 45 (52%)<br>An/other: 20 (24%) | An: 25% (5/20)<br>An/I: 27% (12/45)<br>An/other: 10% (2/20) |
| <b>Gemcitabine-based<br/>(N=41)</b>   | G: 3 (9%)<br>GD: 35 (82%)<br>Other: 3 (9%)           | G: 33% (1/3)<br>G/D: 29% (10/35)<br>G/other: 0              |
| <b>Pazopanib<br/>(N=18)</b>           | -                                                    | -                                                           |

**e-Table 3. Response rate, median progression-free survival, and median overall survival by morphological subtype, primary site, and response to treatment.**

| Group              | End-point                | Morphological subtype                                              | Primary site                                                       | Response to treatment                                               |
|--------------------|--------------------------|--------------------------------------------------------------------|--------------------------------------------------------------------|---------------------------------------------------------------------|
| <b>Ab-regimens</b> | RR (%)                   | CT: 19%<br>PT: 26%<br><i>P-value=0.44</i>                          | DP: 18%<br>PP: 26%<br><i>P-value=0.43</i>                          | -                                                                   |
|                    | Median PFS (IQR), months | CT: 7 (3.3 - 10.5)<br>PT: 5 (2.2 - 9.7)<br><i>P-value= 0.52</i>    | DP: 6 (3 - 12.0)<br>PP: 6 (2.3 - 10.1)<br><i>P-value= 0.52</i>     | NR: 5 (2.2 - 9.2)<br>R: 9 (4.6 - 20.6)<br><i>P-value= 0.01</i>      |
|                    | Median OS (IQR), months  | CT: 18 (8.4 - 26.0)<br>PT: 15 (8.7 - 33.1)<br><i>P-value= 0.34</i> | DP: 15 (8.4 - 23.8)<br>PP: 16 (8.7 - 33.1)<br><i>P-value= 0.79</i> | NR: 16 (8.4-25.2)<br>R: 21 (10.4 - 34.9)<br><i>P-value= 0.29</i>    |
| <b>Gb-regimens</b> | RR (%)                   | CT: 30%<br>PT: 22%<br><i>P-value=0.72</i>                          | DP: 40%<br>PP: 14%<br><i>P-value=0.08</i>                          | -                                                                   |
|                    | Median PFS (IQR), months | CT: 5 (2.3-10)<br>PT: 4 (1.7-11.9)<br><i>P-value= 0.78</i>         | DP: 6 (2.7 - 10.0)<br>PP: 3 (1.7 - 11.9)<br><i>P-value= 0.82</i>   | NR = 3 (1.7 - 6.2)<br>R = 16 (7.1 - N.E.)<br><i>P-value= 0.0004</i> |
|                    | Median OS (IQR), months  | CT: 20 (9.6 - 37.3)<br>PT: 14 (6.0 - 50.2)<br><i>P-value= 0.5</i>  | DP: 20 (9.6-37.3)<br>PP: 18 (6.0-50.2)<br><i>P-value= 0.67</i>     | NR: 14 (5.4 - 24.9)<br>R: 32 (20.3 - 43.8)<br><i>P-value= 0.10</i>  |
| <b>Pazopanib</b>   | RR (%)                   | -                                                                  | -                                                                  | -                                                                   |
|                    | Median PFS (IQR), months | CT: 3 (1.7 - 11.0)<br>PT: 4 (2.2 - 17.1)<br><i>P-value= 0.78</i>   | DP: 5 (1.7 - 17.1)<br>PP: 3 (2.4 - 7.6)<br><i>P-value= 0.34</i>    | -                                                                   |
|                    | Median OS (IQR), months  | CT: 14 (5.0 - 28.9)<br>PT: 20 (4.6 - 33.1)<br><i>P-value= 0.68</i> | DP: 20 (5.2 - 33.1)<br>PP: 8 (4.8 - 42.7)<br><i>P-value= 0.35</i>  | -                                                                   |

RR: response rare; PFS: progression free survival; OS: overall survival; CT: classic-type; PT: proximal-type; DP: distal primary site; PP: proximal primary site; R: responding patients; NR: not responding patients.

**e-Table 4. Population outcome.**

|                                           | <b>Anthracycline-based<br/>(N=85)</b> | <b>Gemcitabine-based<br/>(N=41)</b> | <b>Pazopanib<br/>(N=18)</b> |
|-------------------------------------------|---------------------------------------|-------------------------------------|-----------------------------|
| <b>Median OS from the diagnosis (IQR)</b> | 33 (15-75)                            | 62 (20-152)                         | 60 (18-152)                 |
| <b>Median follow-up (IQR)</b>             | 88 months<br>(27–210)                 | 22 months<br>(14–NE)                | 33 months<br>(19-NE)        |
| <b>Patients status (%)</b>                |                                       |                                     |                             |
| • <b>Dead</b>                             | 68 (80%)                              | 26 (63%)                            | 13 (72%)                    |
| • <b>Alive with disease</b>               | 14 (16%)                              | 14 (34%)                            | 5 (28%)                     |
| • <b>No evidence of disease</b>           | 3 (4%)                                | 1 (4%)                              | 0                           |
| <b>Lost at follow-up (%)</b>              | 8 (9%)                                | 4 (9%)                              | 1 (6%)                      |
